# Supplementary material for: The Art of Writing and Implementing Standard Operating Procedures (SOPs) for Laboratories in Low-Resource Settings: Review of Guidelines and Best Practices
Source: PubMed Central journal article supplement (PMC5094690; doi:10.1371/journal.pntd.0005053), 2016-11-03
Supplement: pntd.0005053.s003.pdf [file pntd.0005053.s003.pdf]

Header with SOP unique identifier, version number, version date, page number and total number of pages

Title box with NIDIAG logo, SOP title and project/study title

|                                                                                   |                                                                                                                                                                                                                                                                             |
|-----------------------------------------------------------------------------------|-----------------------------------------------------------------------------------------------------------------------------------------------------------------------------------------------------------------------------------------------------------------------------|
|  | <b>SOP Title : Indian Ink – Search for Cryptococci in the CSF</b>                                                                                                                                                                                                           |
|                                                                                   | Project/Study : NIDIAG : Evaluation of rapid tests and association with clinical and laboratory predictors for the diagnosis of neglected tropical diseases in patients presenting neurological disorders in rural hospitals in Bandundu, Democratic Republic of the Congo. |

Standardized section headings "Scope and application", "Responsibilities", "Procedures"

### 1. Scope and application

This document provides instructions for the Indian Ink staining technique of cerebrospinal fluid (CSF) to detect cryptococci in the CSF. *Cryptococcus neoformans* is a yeast surrounded by a large capsule, coloured by the Chinese ink, allowing its detection under a microscope at 40x objective.

#### Responsibilities

| Function              | Activities                                                                                                                                      |
|-----------------------|-------------------------------------------------------------------------------------------------------------------------------------------------|
| Laboratory technician | <ul style="list-style-type: none"> <li>CSF sampling</li> <li>Test execution</li> <li>Result interpretation</li> <li>Result recording</li> </ul> |

Text in Arial, font size 11

### 3. Procedures

#### 3.1 Precautions

All CSF samples are potentially infectious. Respect the universal precautions. USE DISPOSABLE GLOVES DURING THE WHOLE PROCEDURE!

#### 3.2 Materials and samples

##### 3.2.1 Materials

- Non sterile gloves, disposable
- Indian Ink
- Microscope glass slide
- Coverslip
- Pasteur pipette, plastic
- Inoculation loop
- Alcohol lamp (or butagaz)
- Microscope, objective 40x
- "Bio-hazard" container

Bullet lists for lists with no specific order

Separate section on safety

##### 3.2.2. Sample to be examined

Fresh CSF: one drop of the pellet of centrifuged CSF (15 minutes at 3.500 rpm) (ONLY for HIV positive patients, with more than 5 white blood cells/ $\mu$ l of CSF)

#### 3.3 Procedure

1. Put on the disposable gloves
2. Identify the microscope glass slide with the patient number
3. Apply one drop of Indian Ink on the microscope glass slide with a Pasteur pipette
4. Flame the inoculation loop (until the wire is red over the whole length), then let it cool down
5. Stir the CSF pellet with the inoculation loop
6. Take one drop of CSF pellet with the inoculation loop, and mix it with the Indian Ink on the microscope glass slide
7. Flame the inoculation loop (until the wire is red over the whole length) to kill the germ
8. Cover the microscope glass slide with a coverslip
9. Observe under the microscope (objective 40x, ocular 10x)

Numbered lists for specific order of steps

Highlighted text (bold font) to put emphasis

10. The yeast can be seen under the form of round spores, budding, and containing grey granulations. The spores measure between 2 and 10  $\mu$ m and are surrounded by a large uncoloured capsule, that is visible as a bright halo around the yeast. They may have different sizes (Figure 1).

Clear graphics

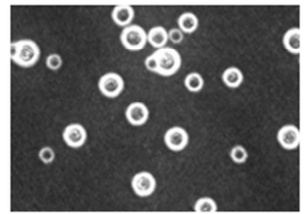

Figure 1. Preparation of CSF coloured with Indian Ink, *Cryptococcus neoformans*, 40x. (Note the large capsule surrounding the yeast)

Separate section on waste management

Standardized section heading "Records and archives" to list all documents to be completed

#### 3.4 Result recording in the CRF

- Report as:
- o Presence of yeast surrounded by a capsule
  - o Negative

#### 3.5 Waste management, cleaning

Throw the used microscope glass in a "Bio-hazard" container.

Standardized section heading "Document history" to list all revisions and to put the signatures of authors, reviewers and approvers

### 4. Records and archives

#### Appendix & forms to be completed

| Number | Title          |
|--------|----------------|
| 1      | Laboratory CRF |

### 5. Document history

| Revision                        |  | Initial version |
|---------------------------------|--|-----------------|
| Name and function               |  | Date            |
| Author                          |  | Signature       |
| Hilde De Boeck<br>Barbara Barbé |  | 31/05/2012      |
| Revised by                      |  |                 |
| Philippe Gillet                 |  | 12/06/2012      |
| Approved by                     |  |                 |
| Veerle Lejon                    |  | 12/07/2012      |
